# Supplementary material for: One Health Approach to Leptospirosis: Human–Dog Seroprevalence Associated to Socioeconomic and Environmental Risk Factors in Brazil over a 20-Year Period (2001–2020)
Source: MDPI journal article supplement (doi:10.3390/tropicalmed8070356), 2023-07-07
Supplement: s1 [file s1]

Table S1. Result of the seroprevalence review of Brazilian dogs

[illegible]

Table S2. Articles of the seroprevalence review of Brazilian dogs

| REFERENCE                | CITY                 | NUMBER OF SAMPLES | POSITIVITY (%) | YEAR OF SAMPLE COLLECTION | TYPE OF DOG                                   | SEROVAR                                                                                                                                              |
|--------------------------|----------------------|-------------------|----------------|---------------------------|-----------------------------------------------|------------------------------------------------------------------------------------------------------------------------------------------------------|
| Abreu et al., 2019       | Barra do Quaraí - RS | 32                | 21,88          | 2013-2014                 | domiciled                                     | Australis, Butembo, Canicola, Cynopteri and Panama                                                                                                   |
|                          | Cerro Largo - RS     | 127               | 8,66           |                           |                                               | Australis, Autumnalis, Bratislava, Butembo, Cynopteri, Copenhageni, Icterohaemorrhagiae, Hardjo and Panama                                           |
|                          | Derrubadas - RS      | 33                | 3,03           |                           |                                               | Pomona                                                                                                                                               |
| Aguiar et al., 2007      | Monte Negro - RO     | 173               | 30,6           | uninformed                | domiciled                                     | Autumnalis, Pyrogenes, Canicola, Shermani, Butembo, Hardjo, Bratislava, Grippotyphosa and Icterohaemorrhagiae                                        |
|                          |                      | 156               | 23,7           |                           |                                               | Autumnalis, Pyrogenes, Canicola, Shermani, Butembo and Icterohaemorrhagiae                                                                           |
| Albuquerque et al., 2020 | Belém - PA           | 145               | 64,14          | 2018                      | shelter                                       | Djasiman, Canicola, Cynopteri, Icterohaemorrhagiae, Seramanga, Sejroe, Pyrogenes, Australis, Shermani and Celledoni                                  |
| Azevedo et al., 2011     | Patos - PB           | 152               | 19,73          | 2008                      | domiciled and treated in clinics/laboratories | Autumnalis, Grippotyphosa, Castellonis, Icterohaemorrhagiae, Australis, Hebdomalis and Butembo                                                       |
| Batista et al., 2004     | Patos - PB           | 130               | 20             | 2003                      | wanderer                                      | autumnalis, pomona, grippotyphosa, patoc, australis, cynopteri, javanica, icterohaemorrhagiae, tarassovi, andamana, shermani, butembo and hebdomadis |
| Batista et al., 2005     | Campina Grande - PB  | 285               | 21,4           | 2003                      | domiciled                                     | Autumnalis, Copenhageni and Canicola                                                                                                                 |
| Benitez et al., 2012     | Jataizinho - PR      | 653               | 20,21          | 2010                      | domiciled                                     | Canicola, Butembo, Pyrogenes, Grippotyphosa, Ballum, Bratislava, Copenhageni, Pomona and Tarassovi                                                   |
| Benitez et al., 2021     | Londrina - PR        | 729               | 21,26          | 2015-2016                 | domiciled                                     | Canicola, Butembo, Bratislava, Grippotyphosa, Copenhageni, Icterohaemorrhagiae, Pomona and Pyrogenes                                                 |
|                          | Alagoa Grande - PB   | 100               | 7              |                           |                                               | Icterohaemorrhagiae                                                                                                                                  |
|                          | Alagoa Nova - PB     | 65                | 9,6            |                           |                                               | Icterohaemorrhagiae, Autumnalis and Pomona                                                                                                           |
|                          | Areia - PB           | 79                | 20,2           |                           |                                               | Icterohaemorrhagiae, Autumnalis and Serjoe                                                                                                           |
| Bernardino et al., 2021  | Bananeiras - PB      | 72                | 6,9            | 2017                      | domiciled                                     | Icterohaemorrhagiae                                                                                                                                  |
|                          | Borborema - PB       | 17                | 10             |                           |                                               | Autumnalis, Pyrogenes and Canicola                                                                                                                   |
|                          | Matinhas - PB        | 14                | 15             |                           |                                               | Icterohaemorrhagiae                                                                                                                                  |
|                          | Pilões - PB          | 23                | 20             |                           |                                               | Icterohaemorrhagiae, Grippotyphosa and Pomona                                                                                                        |
|                          | Serraria - PB        | 21                | 28             |                           |                                               | Icterohaemorrhagiae, Autumnalis and Grippotyphosa                                                                                                    |

|                       |                  |     |                       |           |                                               |                                                                                                                                                                                                                                                                                    |
|-----------------------|------------------|-----|-----------------------|-----------|-----------------------------------------------|------------------------------------------------------------------------------------------------------------------------------------------------------------------------------------------------------------------------------------------------------------------------------------|
| Bier et al., 2013     | Curitiba - PR    | 378 | 27,8                  | 2009-2010 | domiciled                                     | unformed                                                                                                                                                                                                                                                                           |
| Blazius et al., 2005. | Itapema - SC     | 590 | 10,5                  | 2000-2005 | wanderer                                      | Pyrogenes, Canicola and Copenhageni                                                                                                                                                                                                                                                |
| Brasil et al., 2018   | João Pessoa - PB | 384 | 11,7                  | 2015-2016 | domiciled and treated in clinics/laboratories | Icterohaemorrhagiae, Grippotyphosa, Canicola, Djasiman and Pomona                                                                                                                                                                                                                  |
| Brod et al., 2005     | Pelotas - RS     | 105 | 52,4 (71,4 for tande) | 2001      | shelter                                       | Illini, Bratislava, Copenhageni, Sejro, Autumnalis, Van Tienem, Bataviae Swart, Ictero. Kantorovic, Ictero. Verdum and tande (replaces serovars Canicola, Ballum, Icterohaemorrhagiae RGA, Bratislava, Copenhageni, Icterohaemorrhagiae Kantorovic and icterohaemorrhagiae Verdum) |
|                       |                  | 24  | 45,8                  | 2004      |                                               | Bratislava, Butembo, Hardjo and Pyrogenis                                                                                                                                                                                                                                          |
|                       |                  | 38  | 44,7                  | 2005      |                                               | Autumnalis, Bratislava, Butembo, Canicola, Copenhageni, Hardjo, Icterohaemorrhagiae and Pyrogenis                                                                                                                                                                                  |
|                       |                  | 1   | 0                     | 2006      |                                               | none                                                                                                                                                                                                                                                                               |
| Caldart et al., 2015  | Londrina - PR    | 17  | 17,6                  | 2007      | domiciled                                     | Bratislava, Copenhageni and Pomona                                                                                                                                                                                                                                                 |
|                       |                  | 50  | 10                    | 2008      |                                               | Butembo, Copenhageni, Icterohaemorrhagiae and Pomona                                                                                                                                                                                                                               |
|                       |                  | 39  | 10,3                  | 2009      |                                               | Autumnalis, Bratislava and Icterohaemorrhagiae                                                                                                                                                                                                                                     |
|                       |                  | 25  | 20                    | 2010      |                                               | Butembo, Canicola and Pyrogenis                                                                                                                                                                                                                                                    |
|                       |                  | 30  | 13,3                  | 2011      |                                               | Butembo, Canicola and Hebdomadis                                                                                                                                                                                                                                                   |
|                       |                  | 13  | 16,7                  | 2012      |                                               | Copenhageni                                                                                                                                                                                                                                                                        |
| Castro et al., 2011   | Uberlândia - MG  | 268 | 28,4                  | 2008      | domiciled                                     | Autumnalis, Tarassovi, Canicola, Grippotyphosa, Bratislava, Icterohemorrhagiae, Australis, Pomona and Wolffii                                                                                                                                                                      |
| Castro et al., 2011   | Uberlândia - MG  | 150 | 38                    | 2008      | domiciled                                     | Autumnalis, Bratislava, Canicola, Tarassovi, Pomona, Icterohaemorrhagiae, Grippotyphosa, Hardjo, Wolffii and Australis                                                                                                                                                             |
| Castro et al., 2015   | Uberlândia - MG  | 268 | 28,4                  | 2008      | domiciled                                     | Autumnalis, Tarassovi, Canicola, Grippotyphosa, Bratislava, Icterohemorrhagiae, Australis, Pomona and Wolffii                                                                                                                                                                      |
| Coiro et al., 2011    | Botucatu - SP    | 302 | 7.6                   | 2011      | domiciled                                     | Canicola, Pyrogenes, Hardjoe and Djasiman                                                                                                                                                                                                                                          |
| Cortez et. al, 2020   | Apiaí - SP       | 41  | 40,5                  | 2014-2016 | domiciled                                     | Bratislava, Castellonis, Canicola, Copenhageni and Pyrogenes                                                                                                                                                                                                                       |
|                       | Cananeia - SP    | 52  | 7,1                   |           |                                               | Canicola, Hebdomadis, Copenhageni, Icterohaemorrhagiae and Cynopteri                                                                                                                                                                                                               |

|                             |                                        |     |       |           |                                               |                                                                                                                                                                            |
|-----------------------------|----------------------------------------|-----|-------|-----------|-----------------------------------------------|----------------------------------------------------------------------------------------------------------------------------------------------------------------------------|
|                             | Itapeva - SP                           | 202 | 42,6  |           |                                               | Australis, Bratislava, Autumnalis, Butembo, Castellonis, Canicola, Cynopteri, Hebdomadis, Copenhageni, Icterohaemorrhagiae, Panama, Pomona, Pyrogenes, Wolffi and Andamane |
|                             | Itu – SP                               | 277 | 5,1   |           |                                               | Australis, Bratislava, Autumnalis, Canicola, Cynopteri and Grippytyphosa                                                                                                   |
| Cunha et al., 2019          | Curitiba - PR                          | 15  | 20    | unformed  | domiciled                                     | Grippytyphosa                                                                                                                                                              |
| Cunha et al., 2022          | Curitiba - PR                          | 264 | 6,1   | 2017      | domiciled                                     | Copenhageni, Pirogenes and Pomona                                                                                                                                          |
| de Souza Rocha et al., 2022 | Santa Bárbara do Pará - PA             | 51  | 39,2  | 2014      | domiciled                                     | Canicola, Samaranga, Bataviae, Icterohaemorrhagiae and Djasiman                                                                                                            |
|                             |                                        | 68  | 22,05 | 2015      |                                               | Cynopteri, Sejroe, Celledoni, Djasiman, Autumnalis, Ballum, Pyrogenes and Tarassovi                                                                                        |
|                             | Lagoa Grande - PE                      | 53  | 7,5   | 2014-2015 | domiciled                                     | Andamana, Australis, Butembo, Grippytyphosa, Icterohaemorrhagiae, Pyrogenes and Patoc                                                                                      |
| dos Santos et al., 2017     | Petrolina - PE                         | 56  | 10,7  |           |                                               | Andamana, Australis, Butembo, Grippytyphosa, Icterohaemorrhagiae, Pyrogenes and Patoc                                                                                      |
|                             | Serra das Confusões National Park - PI | 71  | 0     | 2013      |                                               | none                                                                                                                                                                       |
| Dreer et al., 2013          | Umuarama - PR                          | 175 | 20    | 2011      | shelter                                       | Canicola, Bratislava, Tarassovi, Hardjo and Pyrogenes                                                                                                                      |
| Félix et al., 2020          | Pelotas - RS                           | 221 | 29    | unformed  | wanderer                                      | Canicola and Icterohaemorrhagia (analysis only for these two)                                                                                                              |
| Fernandes et al., 2013      | Natal - RN                             | 365 | 6,8   | 2011      | domiciled and treated in clinics/laboratories | Shermani, Sentot and Copenhageni                                                                                                                                           |
|                             | Cajazeiras - PB                        | 125 | 8,8   | 2013-2014 | domiciled and treated in clinics/laboratories | Icterohaemorrhagiae, Copenhageni, Bratislava, Canicola, Pomona, Grippytyphosa, Australis, Castellonis and Bataviae                                                         |
|                             | Campina Grande - PB                    | 249 | 10,8  |           |                                               |                                                                                                                                                                            |
| Fernandes et al., 2018      | João Pessoa - PB                       | 338 | 7.1   |           |                                               |                                                                                                                                                                            |
|                             | Patos - PB                             | 206 | 7.7   |           |                                               |                                                                                                                                                                            |
|                             | Sousa - PB                             | 125 | 15,2  | 2014-2015 | domiciled                                     | Icterohaemoragiae, Pomona, Grippytyphosa, Canicola, Autumnalis, Cynopteri, Tarassovi and Wolfii                                                                            |
| Fernandes et al., 2018      | Brejo do Cruz - PB                     | 200 | 14    |           |                                               |                                                                                                                                                                            |
| Fonzar & Langoni, 2012      | Maringá - PR                           | 335 | 12,2  | 2006-2008 | wanderer                                      | Pyrogenes, Canicola, Copennhageni, Bratislava, Grippytyphosa, Hardjo and Pomona                                                                                            |

|                         |                                                       |      |            |           |                                               |                                                                                                               |
|-------------------------|-------------------------------------------------------|------|------------|-----------|-----------------------------------------------|---------------------------------------------------------------------------------------------------------------|
| Freire et al., 2007     | Rio de Janeiro - RJ                                   | 120  | 73,3       | 2004      | domiciled and treated in clinics/laboratories | Icterohaemorrhagiae, Copenhageni and Canicola                                                                 |
| Furtado et al., 2015    | Caiman Ecological Refuge and Barranco Alto Ranch - MS | 29   | 24,1       | 2008-2010 | domiciled                                     | uninformed                                                                                                    |
|                         | Cantao State Park – TO                                | 56   | 16,1       |           |                                               |                                                                                                               |
|                         | Emas National Park – GO                               | 83   | 7,2        |           |                                               |                                                                                                               |
|                         | Assis Chateaubriand – PR                              | 35   | 2,86       |           |                                               | Grippytyphosa                                                                                                 |
|                         | Marechal Cândido Rondon - PR                          | 49   | 12,24      |           |                                               | Canicola, Butembo and Fortbragg                                                                               |
| Hafemann et al., 2018   | Moreira Sales - PR                                    | 15   | 46,67      | 2015      | shelter                                       | Canicola and Butembo                                                                                          |
|                         | Paranavaí - PR                                        | 21   | 19,05      |           |                                               | Canicola and Butembo                                                                                          |
|                         | Pérola - PR                                           | 23   | 8,70       |           |                                               | Canicola                                                                                                      |
|                         | São Jorge do Patrocínio - PR                          | 23   | 26,09      |           |                                               | Canicola, Grippytyphosa and Pomona                                                                            |
|                         | Umuarama - PR                                         | 15   | 26,67      |           |                                               | Canicola                                                                                                      |
| Jorge et al., 2011      | Barão de Melgaço – MT                                 | 103  | 17,48      | 2002-2006 | domiciled                                     | Pyrogenes, Autumnalis, Canicola, Hebdomadis, Sentot, Wolffi, Hardjo and Icterohaemorrhagiae                   |
| Jorge et al., 2017      | Pelotas - RS                                          | 1176 | uninformed | 2003-2007 | domiciled                                     | Canicola, Copenhageni, Ballum and Butembo                                                                     |
| Kikuti et al., 2012     | Botucatu - SP                                         | 1195 | 20,8       | 2003-2010 | domiciled and treated in clinics/laboratories | Canicola, Copenhageni and Icterohaemorrhagiae                                                                 |
| Langoni et al., 2015    | Botucatu - SP                                         | 151  | 39,1       | 2014      | shelter                                       | Copenhageni, Djasiman, Icterohaemorrhagiae, Grippytyphosa, Canicola, Australis, Bratislava, BTU (Botucatu)    |
| Latosinski et al., 2018 | Botucatu - SP                                         | 106  | 5,7        | 2014-2015 | domiciled                                     | Canicola, Autumnalis, Grippytyphosa                                                                           |
| Lavinskya et al., 2012  | Ilhéus - BH                                           | 282  | 7,1        | 2008      | domiciled                                     | Copenhageni, Bratislava, Canicola, Grippytyphosa, Patoc, Autumnalis, Javanica, Cynopteri and Djasiman         |
| Lemo et al., 2012       | Aracaju - SE                                          | 100  | 37         | 2006-2007 | wanderer                                      | Autumnalis, Andamana, Hardjo, Icterohaemorrhagiae, Pyrogenes, Grippytyphosa, Shermani, Tarassovi and Bataviae |
| Lemos et al., 2020      | Patrocínio - MG                                       | 241  | 13,2       | 2017      | domiciled                                     | Copenhageni, Canicola, Icterohaemorrhagiae, Grippytyphosa, Pomona, Tarassovi, Butembo and Hardjo              |

|                        |                      |      |       |            |                                               |                                                                                                                                                 |
|------------------------|----------------------|------|-------|------------|-----------------------------------------------|-------------------------------------------------------------------------------------------------------------------------------------------------|
| Magalhães et al., 2006 | Belo Horizonte - MG  | 2589 | 10,35 | 2001-2002  | domiciled                                     | Canicola, Ballum, Pyrogenes, Icterohaemorrhagiae, Autumnalis, Pomona, Australis and Tarassovi                                                   |
|                        |                      | 828  | 21,74 |            | wanderer                                      |                                                                                                                                                 |
| Magalhães et al. 2007  | Belo Horizonte -MG   | 3417 | 13,1  | 2001-2002  | domiciled and wanderer                        | Canicola, Ballum, Pyrogenes, Icterohaemorrhagiae, Autumnalis, Pomona, Australis and Tarassovi                                                   |
| Mantovan et al., 2021  | Pardinho - SP        | 181  | 3,87  | 2019       | domiciled                                     | Canicola, Icterohaemorrhagiae, Copenhageni and Pyrogenes                                                                                        |
| Martins et al., 2013   | Fortaleza CE         | 37   | 32,4  | 2011-2013  | domiciled and treated in clinics/laboratories | Copenhageni, Icterohaemorrhagiae, Cynopteri, Andamana, Grippytyphosa, Castellonis, Canicola, Serjoe, Wolffi, Autumnalis, Tarassovi and Shermani |
|                        |                      | 228  | 14,4  | 2009       |                                               | Australis, Canicola, Copenhageni, Pyrogenes, Grippytyphosa and Icterohaemorrhagiae                                                              |
| Martins et al., 2013   | Pinhais - PR         | 90   | 38,9  | 2010       | domiciled                                     | Canicola, Icterohaemorrhagiae, Pyrogenes, Australis, Autumnalis, Pomona, Bratislava, Copenhageni, Cynopteri and Grippytyphosa                   |
|                        |                      |      |       |            |                                               |                                                                                                                                                 |
| Mascolli et al., 2016  | Ibiúna - SP          | 570  | 32,8  | 2007-2008  | domiciled                                     | Pyrogenes, Autumnalis and Canicola                                                                                                              |
| Miotto et al., 2018    | São Paulo - SP       | 33   | 55.5  | 2013-2016  | domiciled and treated in clinics/laboratories | Icterohaemorrhagiae, Australis, Pomona, Butembo, Castellonis, Canicola, Shermani, Cynopteri, Autumnalis, Pyrogenes and Sejroe                   |
|                        | Mogi das Cruzes - SP | 24   | 0     |            |                                               | none                                                                                                                                            |
| Miotto et al., 2018    | São Paulo - SP       | 7    | 85,71 | uninformed | wanderer                                      | Grippytyphosa, Autumnalis, Pomona, Icterohaemorrhagiae, Canicola and Sejroe                                                                     |
|                        |                      | 92   | 51    |            |                                               | Autumnalis, Icterohaemorrhagiae, Pomona, Pyrogenes, Canicola, Wolffi and Shermani                                                               |
| Modolo et al., 2006    | Botucatu - SP        | 775  | 15.3  | uninformed | domiciled                                     | Australis, Bratislava, Autumnalis, Canicola, Copenhageni, Icterohaemorrhagiae, Pomona, Pyrogenes and Hardjo                                     |
|                        |                      | 378  | 9,3   | 2009       |                                               | uninformed                                                                                                                                      |
|                        |                      | 286  | 16,4  |            |                                               | Canicola, Icterohaemorrhagiae, Gryppytyphosa, Autumnalis, Australis, Pyrogenes, Djasiman and Pomona                                             |
| Morikawa et al., 2015  | Curitiba - PR        | 235  | 10,6  | 2010       | domiciled                                     | Canicola, Icterohaemorrhagiae, Gryppytyphosa, Autumnalis, Australis and Pyrogenes                                                               |
|                        |                      | 189  | 19    |            |                                               | Canicola, Icterohaemorrhagiae, Gryppytyphosa, Autumnalis and Australis                                                                          |
|                        |                      | 145  | 13,8  |            |                                               | Canicola                                                                                                                                        |
| Oliveira et al., 2012  | Porto Alegre - RS    | 155  | 40,6  | 2007-2009  | domiciled                                     | kirschneri, Canicola, Icterohaemorrhagiae and Copenhageni                                                                                       |
|                        |                      | 65   | 53,8  |            | wanderer                                      | Canicola, Icterohaemorrhagiae and Copenhageni                                                                                                   |

|                             |                            |     |       |            |                                               |                                                                                                                                                                                                |
|-----------------------------|----------------------------|-----|-------|------------|-----------------------------------------------|------------------------------------------------------------------------------------------------------------------------------------------------------------------------------------------------|
|                             |                            | 33  | 72,7  |            | domiciled and treated in clinics/laboratories | Canicola, Icterohaemorrhagiae and Copenhageni                                                                                                                                                  |
| Paz et al, 2015             | Belém - PA                 | 130 | 16,9  | 2009-2010  | domiciled and shelter                         | Canicola, Patoc, Icterohaemorrhagiae and Copenhageni                                                                                                                                           |
|                             | Castanhal - PA             | 144 | 17,4  |            |                                               |                                                                                                                                                                                                |
| Paz et al., 2021            | Salvador - BH              | 57  | 70,18 | uninformed | domiciled and treated in clinics/laboratories | Icterohaemorrhagiae, Australis, Canicola, Pomona, Djasiman, Serjoe and Cynopteri                                                                                                               |
| Pinto-Ferreira et al., 2019 | Foz do Iguaçu - PR         | 649 | 23,11 | 2014       | domiciled                                     | Canicola, Bratislava and Butembo                                                                                                                                                               |
| Rodrigues et al., 2007      | São Paulo - SP             | 20  | 80    | uninformed | domiciled and treated in clinics/laboratories | Copenhageni, Icterohaemorrhagiae, Hardjobovis, Autumnalis, Bratislava, Butembo, Pyrogenes, Hardjoprojtno, Wolffi, Canicola, Grippotyphosa, Patoc, Sentot, Castelonis, Cynopteri and Hebdomadis |
| Sant'anna et al., 2017      | São Gonçalo - RJ           | 131 | 32,1  | uninformed | domiciled                                     | Icterohaemorrhagiae and Canicola                                                                                                                                                               |
| Santos et al., 2019         | Curitiba - PR              | 15  | 0     | 2015-2016  | domiciled                                     | none                                                                                                                                                                                           |
| Santos et al., 2021         | São Paulo - SP             | 31  | 64,5  | 2018-2019  | domiciled and treated in clinics/laboratories | Autumnalis, Icterohaemorrhagiae, Canicola, Bratislava, Australis, Shermani, Pyrogenes, Pomona, Grippotyphosa, Cynopteri, Bataviae, Ballum, Butembo and Bratislava                              |
| Scandura et al., 2020       | São Bernardo do Campo - SP | 10  | 28,57 | 2019       | domiciled and treated in clinics/laboratories | Copenhageni and Brastilava                                                                                                                                                                     |
| Sevá et al., 2020           | São Miguel Arcanjo – SP    | 331 | 11    | 2015       | domiciled                                     | Cynopteri, Butembo, Grippotyphosa, Guaicura and Castellonis                                                                                                                                    |
|                             | São Miguel Arcanjo – SP    | 373 | 7     | 2016       |                                               | Cynopteri, Butembo, Hardjo (Hardjoprajitno), Grippotyphosa, Guaicura, Pomona, Copenhageni and Pyrogenes                                                                                        |
|                             | São Miguel Arcanjo – SP    | 347 | 14    | 2017       |                                               | Cynopteri, Canicola, Butembo, Hardjo (Hardjoprajitno), Grippotyphosa, Guaicura, Pomona, Hebdomadis and Copenhageni                                                                             |
| Silva et al. 2014           | Alegrete - RS              | 5   | 20    | uninformed | domiciled                                     | Icterohaemorrhagiae and Canicola                                                                                                                                                               |
|                             | Chuí - RS                  | 1   | 100   |            |                                               |                                                                                                                                                                                                |
|                             | Cruz Alta - RS             | 2   | 0     |            |                                               |                                                                                                                                                                                                |
|                             | Santana da Boa Vista – RS  | 4   | 0     |            |                                               |                                                                                                                                                                                                |

|                          |                           |      |       |            |                                               |                                                                                                                                                               |
|--------------------------|---------------------------|------|-------|------------|-----------------------------------------------|---------------------------------------------------------------------------------------------------------------------------------------------------------------|
| Silva et al., 2006       | Botucatu - SP             | 1000 | 17,9  | 2001       | domiciled                                     | Castellonis, Autumnalis, Pyrogenes, Icterohaemorrhagiae, Canicola, Australis, Shermani, Copenhageni, Grippotyphosa, Brasiliensis, Butembo, Panama ande Wolffi |
| Silva et al., 2009       | Botucatu - SP             | 1000 | 17,9  | 2001       | domiciled                                     | Castellonis, Autumnalis, Pyrogenes, Icterohaemorrhagiae, Canicola, Australis, Shermani, Copenhageni, Grippotyphosa, Brasiliensis, Butembo, Panama ande Wolffi |
|                          | Garanhuns - PE            | 1    | 100   |            |                                               | Patoc                                                                                                                                                         |
| Silva et al., 2015       | Itiquira - MT             | 2    | 50    | 2012       | domiciled                                     | Shermani                                                                                                                                                      |
|                          | Poconé - MT               | 7    | 42,86 |            |                                               | Brastilava                                                                                                                                                    |
|                          | Sobral - CE               | 3    | 66,67 |            |                                               | Copenhageni                                                                                                                                                   |
| Silva et al., 2016       | Ubatuba - SP              | 205  | 14,6  | uninformed | domiciled                                     | Pyrogenes, Autumnalis, Canicola, Copenhageni, Icterohaemorrhagiae and Gryptotyphosa                                                                           |
|                          | Patos - PB                | 39   | 2,6   |            |                                               |                                                                                                                                                               |
|                          | SantaTerezinha - PB       | 33   | 15,2  |            |                                               |                                                                                                                                                               |
| Silva et al., 2017       | São José de Espinhas - PB | 46   | 13    | 2015       | domiciled                                     | Pomona, Bataviae, Copenhageni, Australis, Bratislava, Icterohaemorrhagiae, Autumnalis, Tarassovi, Grippotyphosa, Djasimane and Canicola                       |
|                          | São Jose do Bonfim – PB   | 82   | 12,2  |            |                                               |                                                                                                                                                               |
|                          | São Mamede - PB           | 106  | 4,7   |            |                                               |                                                                                                                                                               |
| Silva et al., 2017       | Teresina - PI             | 425  | 17,41 | 2010-2012  | shelter                                       | Icterohaemorrhagiae, Canicola and Bratislava                                                                                                                  |
| Silva et al., 2018       | Teresina - PI             | 558  | 13,8  | 2014       | domiciled                                     | Canicola, Autumnalis, Icterohaemorrhagiae, Butembo, Australis, Castellonis, Pyrogenes, Copenhageni, Grippotyphosa, Pomona and Shermani                        |
|                          |                           | 19   | 47    | 2014       | domiciled and treated in clinics/laboratories | Canicola, Autumnalis, Cynopteri and Copenhageni                                                                                                               |
|                          |                           | 46   | 26    | 2015       | domiciled and treated in clinics/laboratories | Pomona, Autumnalis, Cynopteri and Copenhageni                                                                                                                 |
| Silvestrini et al., 2020 | São Paulo - SP            | 51   | 29    | 2016       | domiciled and treated in clinics/laboratories | Pomona, Autumnalis, Cynopteri and Icterohaemorrhagiae                                                                                                         |
|                          |                           | 60   | 52    | 2017       | domiciled and treated in clinics/laboratories | Australis, Autumnalis, Cynopteri and Copenhageni                                                                                                              |



|                        |                                   |     |       |           |                                                     |                                                                                                     |
|------------------------|-----------------------------------|-----|-------|-----------|-----------------------------------------------------|-----------------------------------------------------------------------------------------------------|
| Souza et al.,<br>2016  | Uberlândia - MG                   | 52  | 38    | 2018      | domiciled and<br>treated in<br>clinics/laboratories | Pomona, Autumnalis, Cynopteri and Copenhageni                                                       |
|                        |                                   | 22  | 27    | 2019      | domiciled and<br>treated in<br>clinics/laboratories | Canicola, Cynopteri, Icterohaemorrhagiae and Copenhageni                                            |
|                        | Barão de Melgaço –<br>MT          | 27  | 59,25 | 2008-2009 | domiciled                                           | Icterohaemorrhagiae, Autumnalis, Canicola, Hardjo,<br>Bratislava, Grippothyphosa, Pomona and Wolffi |
|                        | Corumbá - MT                      | 45  | 17,78 |           |                                                     | Australis and Icterohaemorrhagiae                                                                   |
| Spanga et al.,<br>2019 | Poconé - MT                       | 49  | 12,24 | 2009-2012 | domiciled                                           | Australis, Icterohaemorrhagiae and Autumnalis                                                       |
|                        | Santo Antônio de<br>Leverger - MT | 319 | 5,64  |           |                                                     | Australis, Grippotyphosa, Icterohaemorrhagiae, Hebdomadis,<br>Autumnalis and Tarassovi              |
|                        |                                   | 16  | 12,5  |           |                                                     | Icterohaemorrhagiae                                                                                 |

---

Table S3. Correlation between Incidence Rate and GDP, Brazil (2001 to 2020)

| <b>GDP (year) X Incidence Rate (year)</b> | <b>Correlation</b> | <b>p-value</b> |
|-------------------------------------------|--------------------|----------------|
| GDP (2002) x Incidence (2001)             | 0.34               | <0.001         |
| GDP (2002) x Incidence (2002)             | 0.33               | <0.001         |
| GDP (2003) x Incidence (2003)             | 0.34               | <0.001         |
| GDP (2004) x Incidence (2004)             | 0.34               | <0.001         |
| GDP (2005) x Incidence (2005)             | 0.35               | <0.001         |
| GDP (2006) x Incidence (2006)             | 0.34               | <0.001         |
| GDP (2007) x Incidence (2007)             | 0.35               | <0.001         |
| GDP (2008) x Incidence (2008)             | 0.35               | <0.001         |
| GDP (2009) x Incidence (2009)             | 0.34               | <0.001         |
| GDP (2010) x Incidence (2010)             | 0.36               | <0.001         |
| GDP (2011) x Incidence (2011)             | 0.35               | <0.001         |
| GDP (2012) x Incidence (2012)             | 0.37               | <0.001         |
| GDP (2013) x Incidence (2013)             | 0.36               | <0.001         |
| GDP (2014) x Incidence (2014)             | 0.35               | <0.001         |
| GDP (2015) x Incidence (2015)             | 0.36               | <0.001         |
| GDP (2016) x Incidence (2016)             | 0.34               | <0.001         |
| GDP (2017) x Incidence (2017)             | 0.33               | <0.001         |
| GDP (2018) x Incidence (2018)             | 0.34               | <0.001         |
| GDP (2019) x Incidence (2019)             | 0.34               | <0.001         |
| GDP (2019) x Incidence (2020)             | 0.28               | <0.001         |
